# Supplementary material for: Assessing the organizational context for EBP implementation: the development and validity testing of the Implementation Climate Scale (ICS)
Source: Springer Nature journal article supplement (doi:10.1186/s13012-014-0157-1), 2014-10-22
Supplement: MOESM2 [file 9772844]

# Implementation Climate Scale (ICS) Scoring Instructions

Mark G. Ehrhart  
mehrhart@mail.sdsu.edu

Gregory A. Aarons  
gaarons@ucsd.edu

This measure assesses employees' shared perceptions of the policies, practices, procedures, and behaviors that are rewarded, supported, and expected in order to facilitate effective EBP implementation.

## Abbreviated Items and Scoring

| Item #                                      | Scale                                                     | Factor Loading | $\alpha$   |
|---------------------------------------------|-----------------------------------------------------------|----------------|------------|
| <b>Scale 1: Focus on EBP</b>                |                                                           |                | <b>.91</b> |
| 1                                           | One of this team/agency's goals is to use EBP effectively | .94            |            |
| 2                                           | People think implementation is important                  | .85            |            |
| 3                                           | Using EBP is a top priority in this team/agency           | .79            |            |
| <b>Scale 2: Educational Support for EBP</b> |                                                           |                | <b>.84</b> |
| 4                                           | Provides conferences, workshops, or seminars              | .97            |            |
| 5                                           | Provides EBP trainings or in-services                     | .75            |            |
| 6                                           | Provides EBP training materials, journals, etc.           | .54            |            |
| <b>Scale 3: Recognition for EBP</b>         |                                                           |                | <b>.88</b> |
| 7                                           | Clinicians who use EBP are seen as clinical experts       | .87            |            |
| 8                                           | Clinicians who use EBP are held in high esteem            | .85            |            |
| 9                                           | Clinicians who use EBP are more likely to be promoted     | .70            |            |
| <b>Scale 4: Rewards for EBP</b>             |                                                           |                | <b>.81</b> |
| 10                                          | Provides financial incentives for use of EBP              | .91            |            |
| 11                                          | More likely to get a bonus or a raise                     | .77            |            |
| 12                                          | Provides ability to accumulate compensated time           | .63            |            |
| <b>Scale 5: Selection for EBP</b>           |                                                           |                | <b>.89</b> |
| 13                                          | Selects staff who have previously used EBP                | 1.0            |            |
| 14                                          | Selects staff who have formal education supporting EBP    | .72            |            |
| 15                                          | Selects staff who value EBP                               | .70            |            |
| <b>Scale 6: Selection for Openness</b>      |                                                           |                | <b>.91</b> |
| 16                                          | Selects staff who are adaptable                           | .98            |            |
| 17                                          | Selects staff who are flexible                            | .98            |            |
| 18                                          | Selects staff who are open to new types of interventions  | .65            |            |

## SCORING THE SCALES

The score for each subscale is created by computing a mean score for each set of items that load on a given subscale. For example, items 1-3 constitute Scale 1.

## COMPUTING THE TOTAL SCORE

A mean of the scale scores may be computed to yield the mean score for the total ICS.

Please direct any questions to Dr. Aarons by email at [gaarons@ucsd.edu](mailto:gaarons@ucsd.edu).
